# Supplementary figures and images for: Temporal selectivity declines in the aging human auditory cortex
Source: eLife journal article supplement (doi:10.7554/elife.55300), 2020-07-03

**a HG/HS**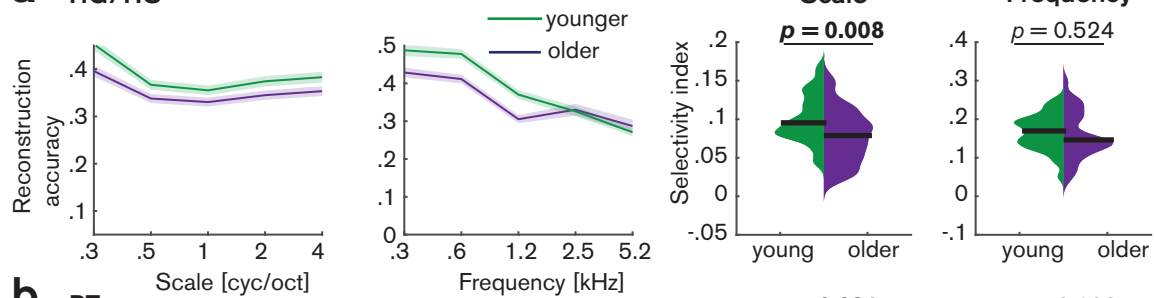**b PT**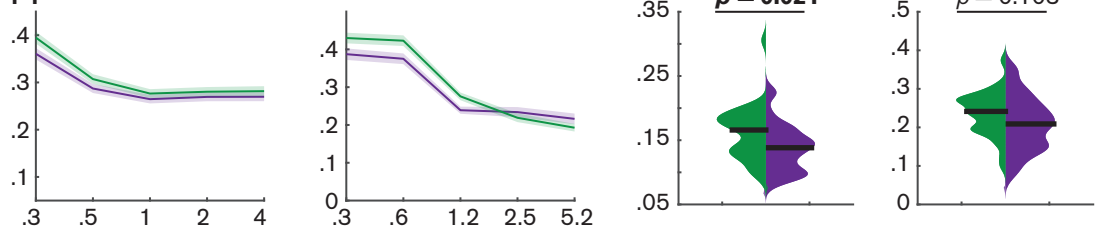**c PP**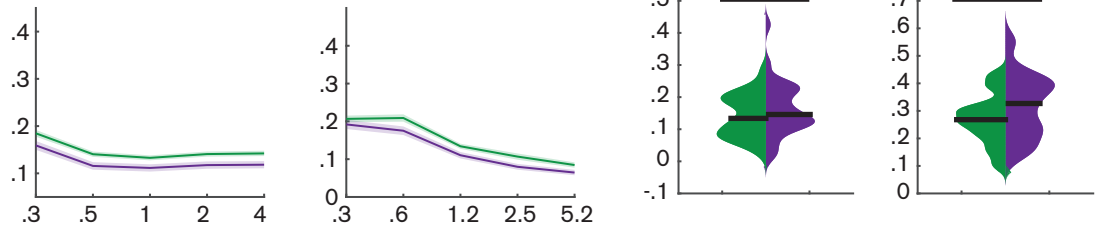**d STG**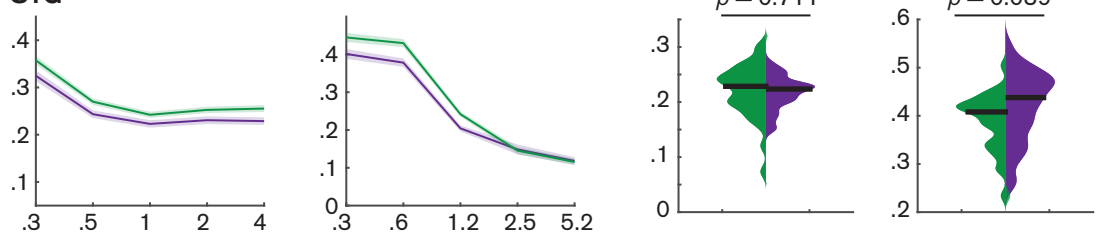**e STS**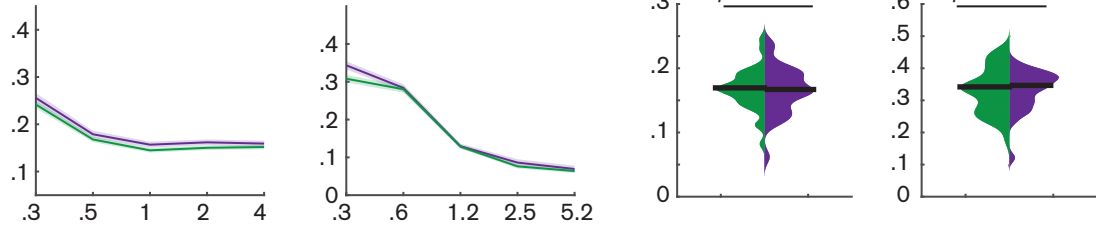**f** Control regions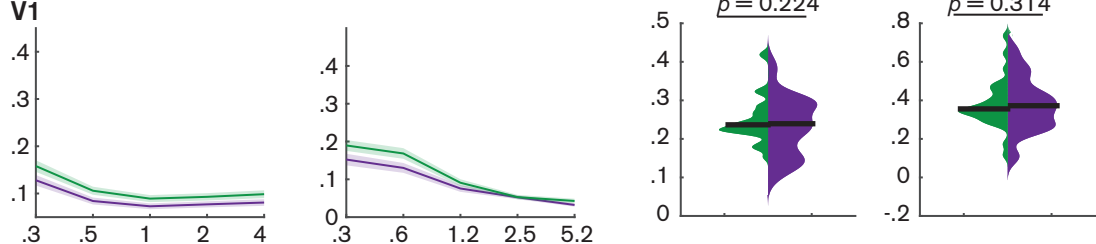**g SPG**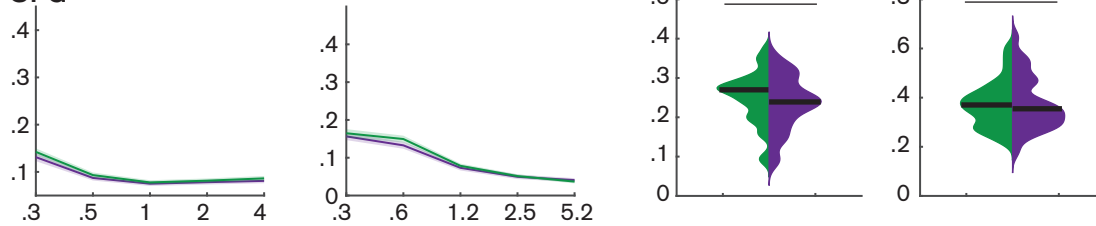**h MFG**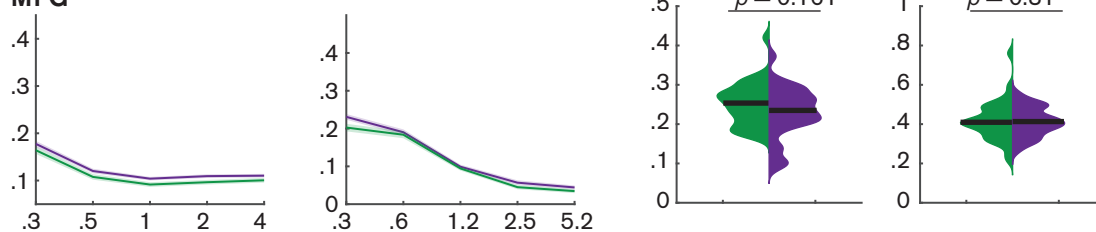

Supplement: supp [file elife-55300-supp-v1.zip]

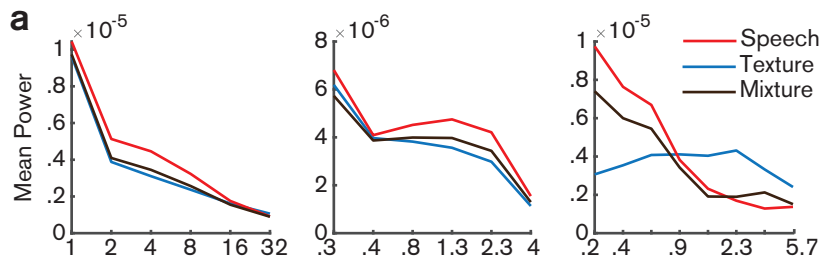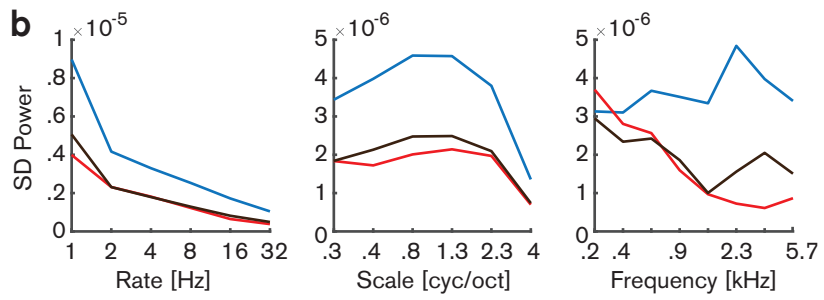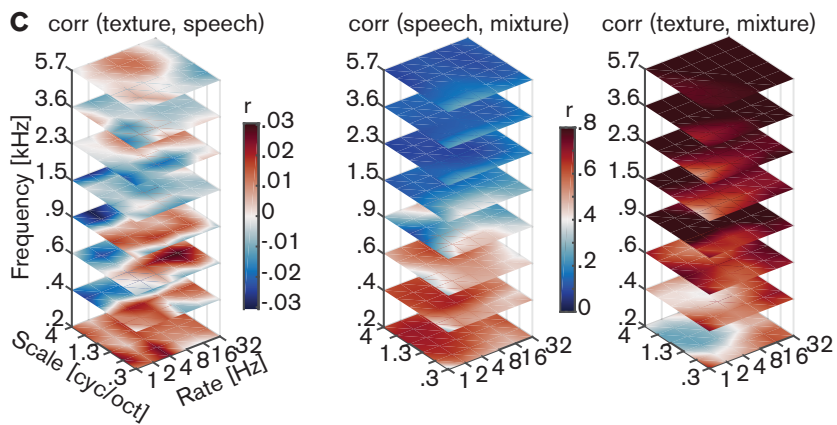

Supplement: supp [file elife-55300-supp-v1.zip]

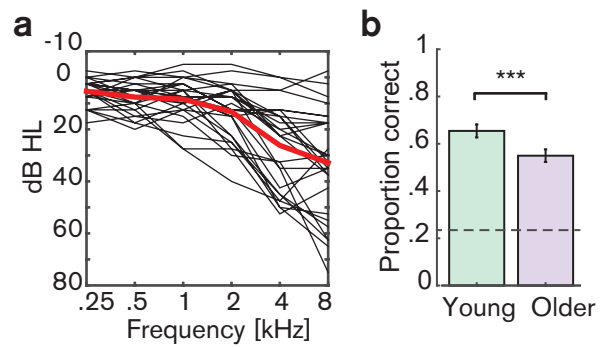

Supplement: supp [file elife-55300-supp-v1.zip]

**a**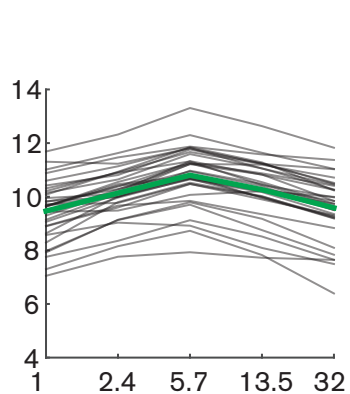**HG/HS**  
**Young**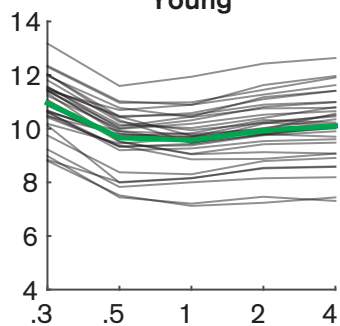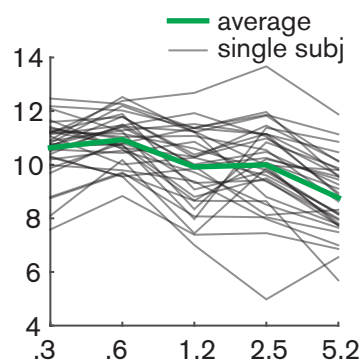**b**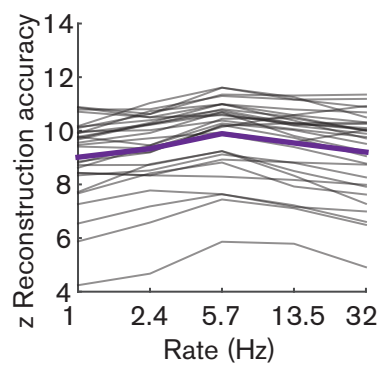**Older**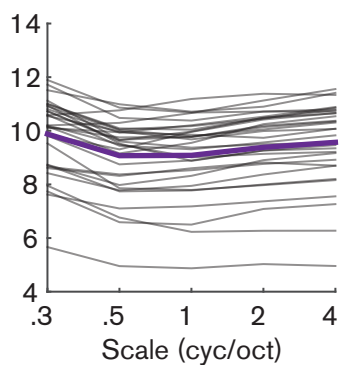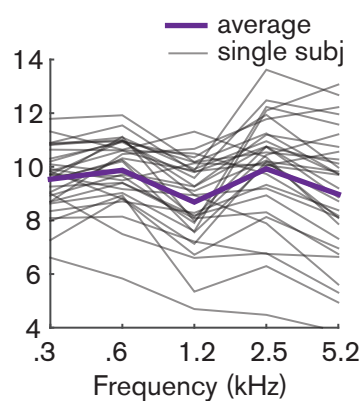

Supplement: supp [file elife-55300-supp-v1.zip]

Young

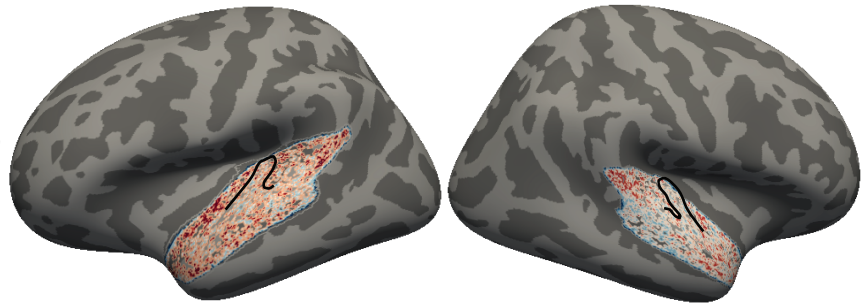

Older

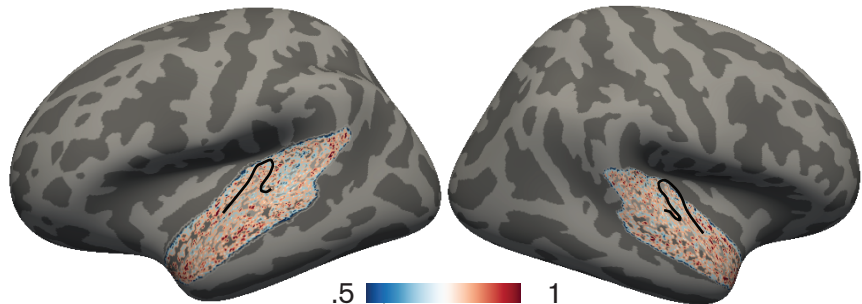

.5 1  
S/ Rate

Supplement: supp [file elife-55300-supp-v1.zip]

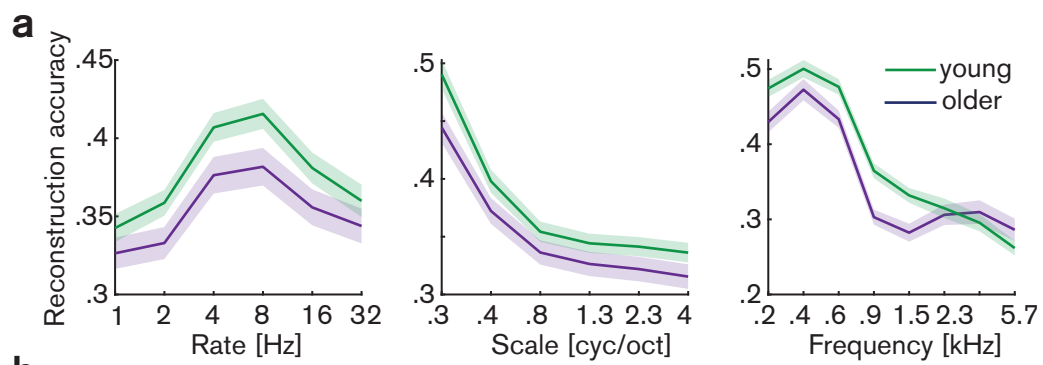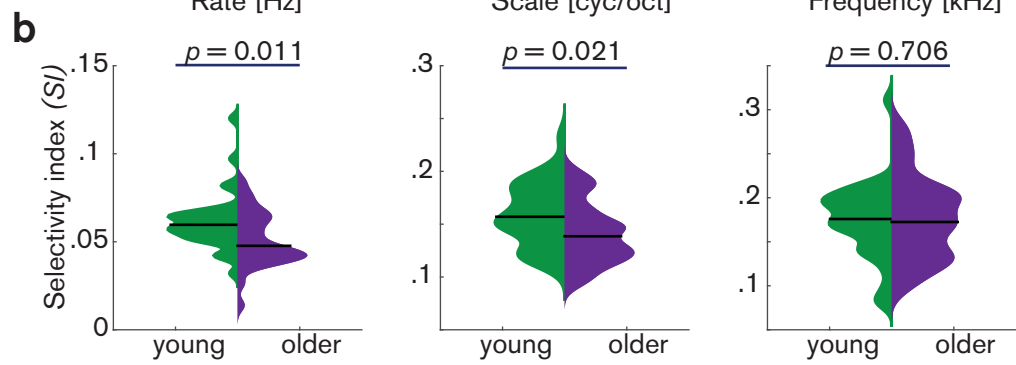

Supplement: supp [file elife-55300-supp-v1.zip]
